# Supplementary material
Source: publisher site journal article supplement (https://static.cambridge.org/content/id/urn:cambridge.org:id:article:S1368980020000968/resource/name/S1368980020000968supp003.docx)
Supplement: Supplementary file 1 [file S1368980020000968supp003.docx]

**Supplemental Table 2: Maternal depression and child minimum dietary diversity associations, by child age**

|  | **Child minimum dietary diversity**  **(6-23.9m) (N=1383)** | | **Child minimum dietary diversity**  **(24-59.9m) (N=1775)** | |
| --- | --- | --- | --- | --- |
| **Unadjusted** | **Adjusted**† | **Unadjusted** | **Adjusted**† |
| **OR (95% CI)** | **OR (95% CI)** | **OR (95% CI)** | **OR (95% CI)** |
| Maternal depression: (PHQ-9 ≥10) | 0.81 (0.48, 1.37) | 1.00 (0.58, 1.72) | 0.71 (0.46, 1.11) | 0.71 (0.45, 1.11) |
| Maternal age | 0.98 (0.96, 1.00) | 1.00 (0.98, 1.03) | 0.99 (0.97, 1.01) | 1.00 (0.98, 1.02) |
| Maternal schooling | 1.11*** (1.08, 1.15) | 1.09*** (1.06, 1.13) | 1.07*** (1.04, 1.09) | 1.05*** (1.02, 1.08) |
| More than 1 child under 5 years | 0.74** (0.58, 0.95) | 0.85 (0.66, 1.11) | 0.96 (0.68, 1.35) | 0.98 (0.68, 1.40) |
| Mother as a household head | 0.90 (0.71, 1.14) | 0.96 (0.76, 1.22) | 0.87 (0.72, 1.04) | 0.88 (0.73, 1.05) |
| **Caste/ethnicity** |  |  |  |  |
| Socially excluded | 1.0 (reference) | 1.0 (reference) | 1.0 (reference) | 1.0 (reference) |
| *Brahmin/Chhetri* | 1.45*** (1.13, 1.97) | 1.19 (0.91, 1.57) | 1.78*** (1.40, 2.26) | 1.62*** (1.28, 2.06) |
| Others | 1.00 (0.67, 1.50) | 0.99 (0.66, 1.50) | 1.05 (0.77, 1.43) | 1.06 (0.77, 1.45) |
| **Agroecological Zone** |  |  |  |  |
| Mountain | 1.0 (reference) | 1.0 (reference) | 1.0 (reference) | 1.0 (reference) |
| Hill | 1.23 (0.85, 1.84) | 1.01 (0.68, 1.51) | 0.93 (0.68, 1.27) | 0.87 (0.64, 1.20) |
| *Terai* | 0.93 (0.62, 1.39) | 0.63* (0.41, 0.97) | 0.61** (0.46, 0.86) | 0.46*** (0.32, 0.68) |
| **Equity quintile** |  |  |  |  |
| Lowest | 1.0 (reference) | 1.0 (reference) | 1.0 (reference) | 1.0 (reference) |
| 2nd quintile | 1.02 (0.76, 1.39) | 1.00 (0.74, 1.36) | 0.84 (0.65, 1.08) | 0.87 (0.66, 1.13) |
| Middle | 1.35 (0.98, 1.87) | 1.17 (0.82, 1.66) | 1.11 (0.82, 1.48) | 1.23 (0.91, 1.67) |
| 4th quintile | 1.42* (1.01, 1.99) | 1.39 (0.95, 2.05) | 1.14 (0.83, 1.56) | 1.46* (1.01, 2.11) |
| Wealthiest | 2.09** (1.23, 3.58) | 1.96* (1.08, 2.57) | 1.28 (0.83, 1.98) | 1.40 (0.79, 2.48) |

OR, Odd Ratio; CI, Confidence Interval

†adjusted for maternal age, year of schooling, more than one child less than five, mother household head, caste/ethnicity, agro-ecological zone and equity quintile

*p <0.05, **p<0.01, *** p<0.001
